# Supplementary material for: Cell-Type-Specific Profiling of Alternative Translation Identifies Regulated Protein Isoform Variation in the Mouse Brain
Source: PubMed Central journal article supplement — Cell Rep. Author manuscript; Available in PMC 2019 Feb 27. (PMC6392083; doi:10.1016/j.celrep.2018.12.077), 2019-01-15
Supplement: NIHMS1518824-supplement-1.pdf [file NIHMS1518824-supplement-1.pdf]

**Cell Reports, Volume 26**

**Supplemental Information**

**Cell-Type-Specific Profiling of Alternative  
Translation Identifies Regulated Protein  
Isoform Variation in the Mouse Brain**

**Darshan Sapkota, Allison M. Lake, Wei Yang, Chengran Yang, Hendrik Wesseling, Amanda Guise, Ceren Uncu, Jasbir S. Dalal, Andrew W. Kraft, Jin-Moo Lee, Mark S. Sands, Judith A. Steen, and Joseph D. Dougherty**

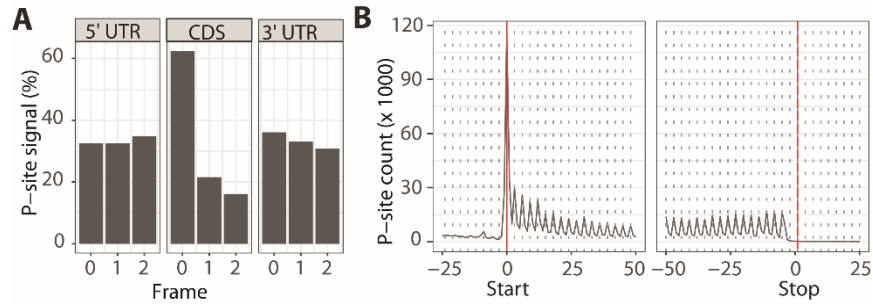

**Figure S1. Neuron/glia culture ribosome footprints indicate bona fide translation.** *Related to Figure 1.* **A)** More than 60% of P-sites detected in the footprints mapping to the CDS shows the translation of the correct reading frame. **B)** P-sites detected in the footprints mapping to the CDS exhibit 3-nucleotide periodicity of ribosomes. Data are from a 'no HHT, No KCl' sample, and the same pattern was observed with other samples.

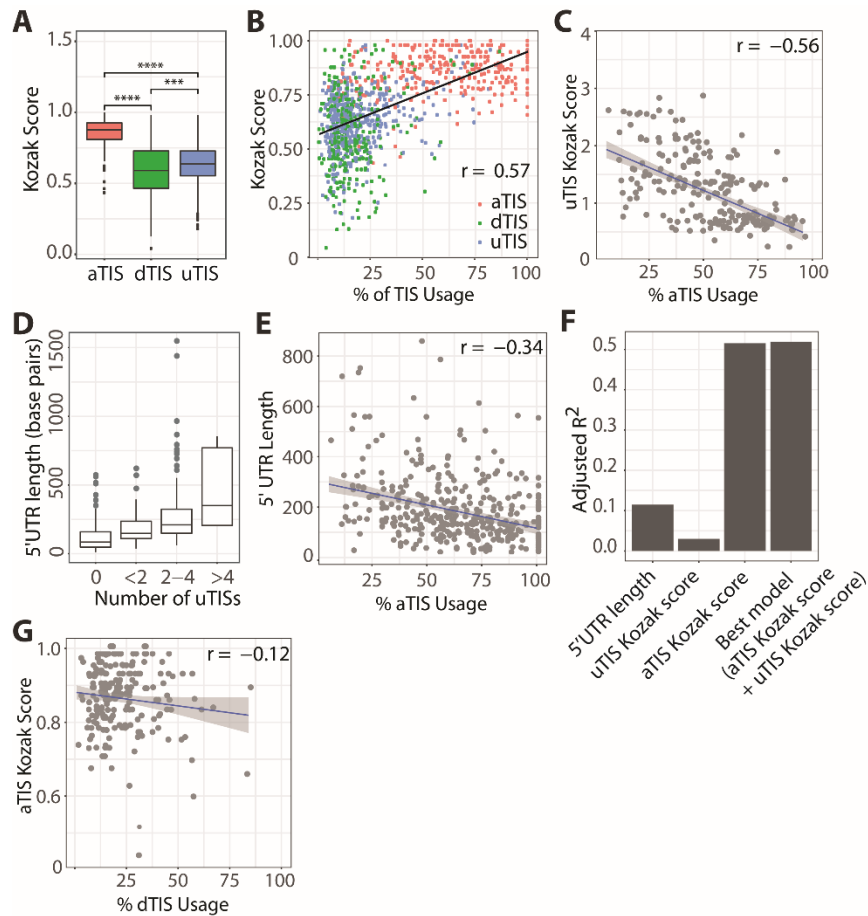

**Figure S2. Identified TISs reveal the complexity of initiation from neural transcripts.** *Related to Figure 1.* **A)** Kozak strength varies significantly between TISs. Overall comparison of Kozak strengths was done using post hoc Tukey's Honestly Significant Difference test and showed a highly significant difference ( $p = 0$ , not shown in the box). Pair-wise comparison was done using  $t$  tests (\*\*\*:  $p \leq 0.001$ ; \*\*\*\*:  $p \leq 0.0001$ ). **B)** Comparison of TIS usage and Kozak strength shows that TISs with higher Kozak scores, especially aTISs, are more favorably used for initiation **(C)** uTISs with higher Kozak scores inhibit initiation from aTISs. The Y axis represents the sum of the kozak scores of all uTIS in a given transcripts. **(D-E)** Longer 5'UTRs contain more uTISs (D) and inhibit initiation from aTISs more strongly than shorter 5'UTR (E). **(F)** Regression-based model prediction shows the Kozak scores of aTIS and uTIS as the strongest determinants of initiation from aTISs (R-squared 0.519). **(G)** aTISs with higher Kozak scores moderately reduce initiation from dTISs.  $r$  = Pearson correlation coefficient. TIS usage was calculated as the P-site counts at a TIS over total P-site counts across all TISs on a given transcript. Kozak Strength was calculated by comparing the TIS context sequences with a position weight matrix derived from an a polysome profiling experiment determining ribosome loading on synthetic sequences as described in Sample et. al., 2019 and shown in arbitrary unit in the Y axis, with 1 indicating the best strength.

| <b>A</b> | <b>Transcript ID and name</b> | <b>Readthrough peptide detected</b> |
|----------|-------------------------------|-------------------------------------|
|          | ENSMUST00000079081, Aqp4      | DSSGEVLSSV <b>R</b>                 |
|          | ENSMUST00000075312, Ttr       | HYTIAALLSPYSYSTTAVVSNPQNTETQPRR     |
|          | ENSMUST00000029128, Map1lc3a  | KDEdGFLYmVYASQETFGF <b>Q</b> VK     |

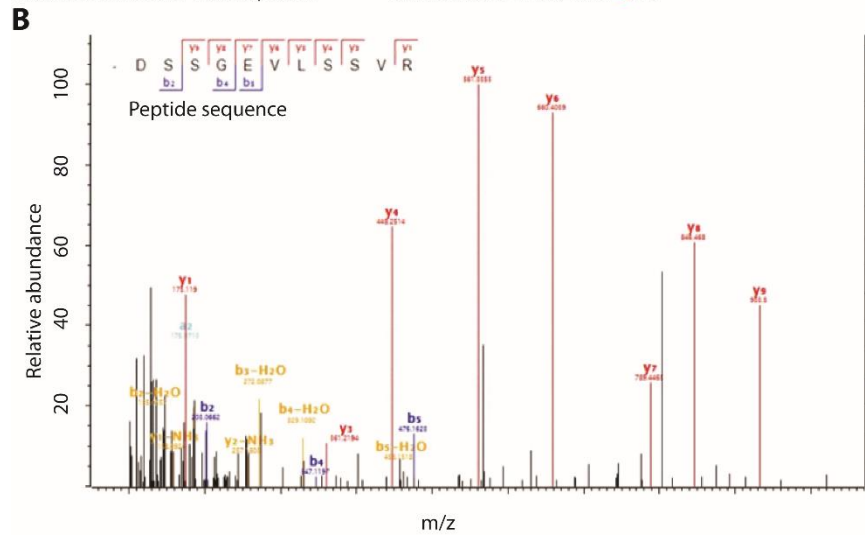

**Figure S3. Detection of readthrough peptides in mouse brain mass spectrometry data.** *Related to Figures 4 and 6.* (A) Peptides corresponding to three readthrough regions are shown. Stop codon-re-coded amino acids are in red. (B) Tandem mass spectra and mass-to-charge ratios (m/z) of b and y product ions corresponding to the Aqp4 readthrough peptide is shown. Mouse brain mass spectrometry data reported by Sharma *et al* 2015 were examined setting the posterior error probability cut off value at 0.01.

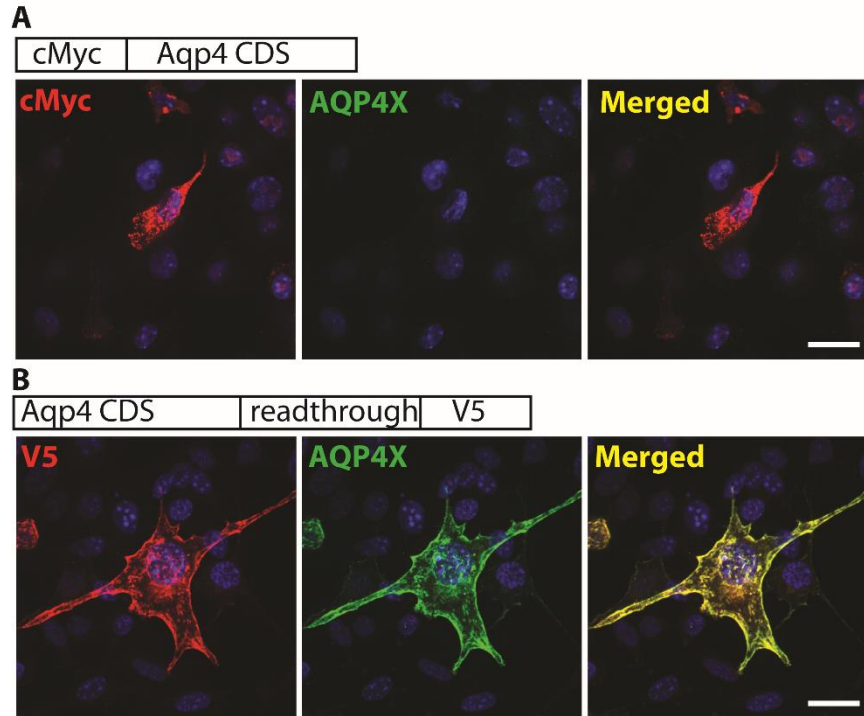

**Figure S4. Validation of anti-Aqp4X antibody.** *Related to Figures 5 and S5.* DBT glioblastoma cells were transfected with constructs expressing normal Aqp4 with an N-terminal cMyc tag (**A**) or Aqp4X with a C-terminal V5 tag (**B**). Immunostaining of the transfected cells shows that a cMyc-positive cell does not express Aqp4X, whereas a V5-positive cell does. Scale bars = 20  $\mu$ M.

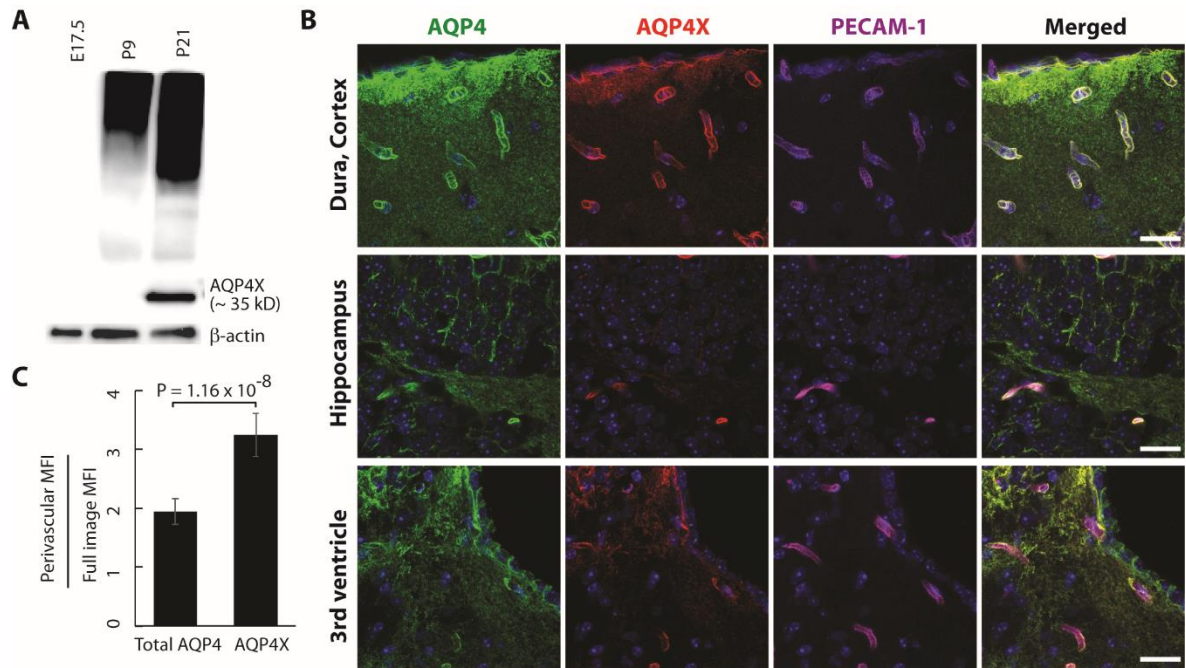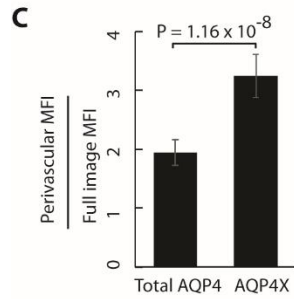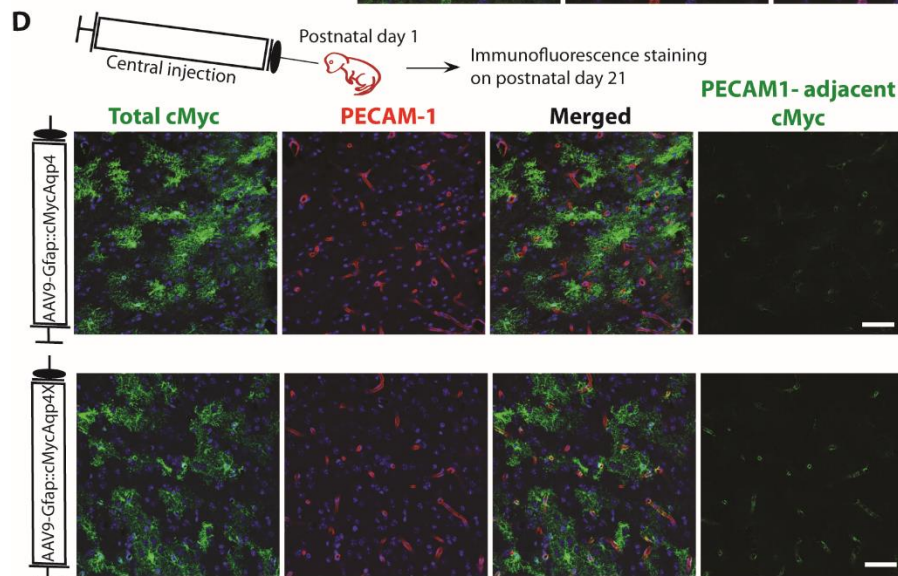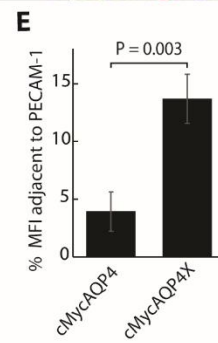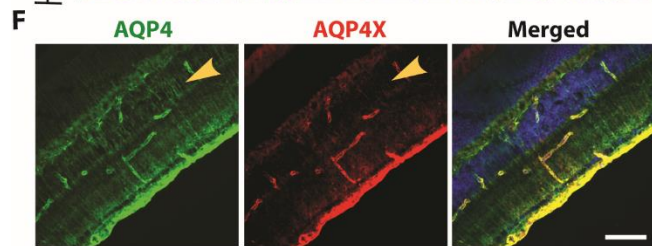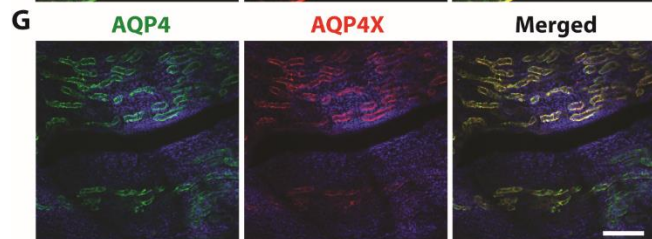

**Figure S5. Readthrough confers the perivascular localization ability to AQP4 in the central nervous system.** *Related to Figure 5.* **A)** Western blot on brain lysates detects the expected 35 kD band in the adult brain but not in the developing brain. Note that high molecular weight smear accompanied the expected band, as is commonly seen for other AQP4 antibodies<sup>89</sup>. **B)** Immunostaining of the adult mouse brain shows diffused expression of AQP4 and PECAM 1-overlapping perivascular expression of AQP4X in different regions. **C)** Quantification of MFIs from B shows the signal from anti-AQP4X is significantly more perivascular than the total (AQP4 + AQP4X) signal from anti-AQP4. **D)** AAV9-mediated astrocytic expression of cMyc-tagged AQP4X- (an extra stop codon added to prevent readthrough) or AQP4X+ (stop mutated to allow constitutive readthrough) in the brain followed by immunostaining shows that cMycAQP4 is less contiguous with the perivascular PECAM-1 than cMycAQP4X. Regions of interest were drawn around PECAM-1 to distinguish perivascular cMyc. **E)** Quantification of cMyc MFIs from D shows that perivascular cMyc accounts for 4% and 14% of the total cMyc in AAV9-Gfap::cMycAqp4X-injected brain and AAV9-Gfap::cMycAqp4X+ injected brain, respectively. **F, G)** Immunofluorescence staining of the retina (F) and kidney (G) from adult mice shows the expression of AQP4X in these tissues. Note that AQP4X largely perivascular in the retina but completely overlaps with AQP4 in the kidney. The nuclear stain DAPI is removed from the single channel images for the retina to highlight the presence of AQP4 outside the perivascular region (arrow). For C and E: 3 mice; 6 sections/mouse. Unpaired t-test; error bars, standard errors of mean. MFI, mean fluorescence intensity; AAV9, Adeno-associated virus 9. Scale bars = 20  $\mu$ M in B, 50  $\mu$ M in D, G and G.



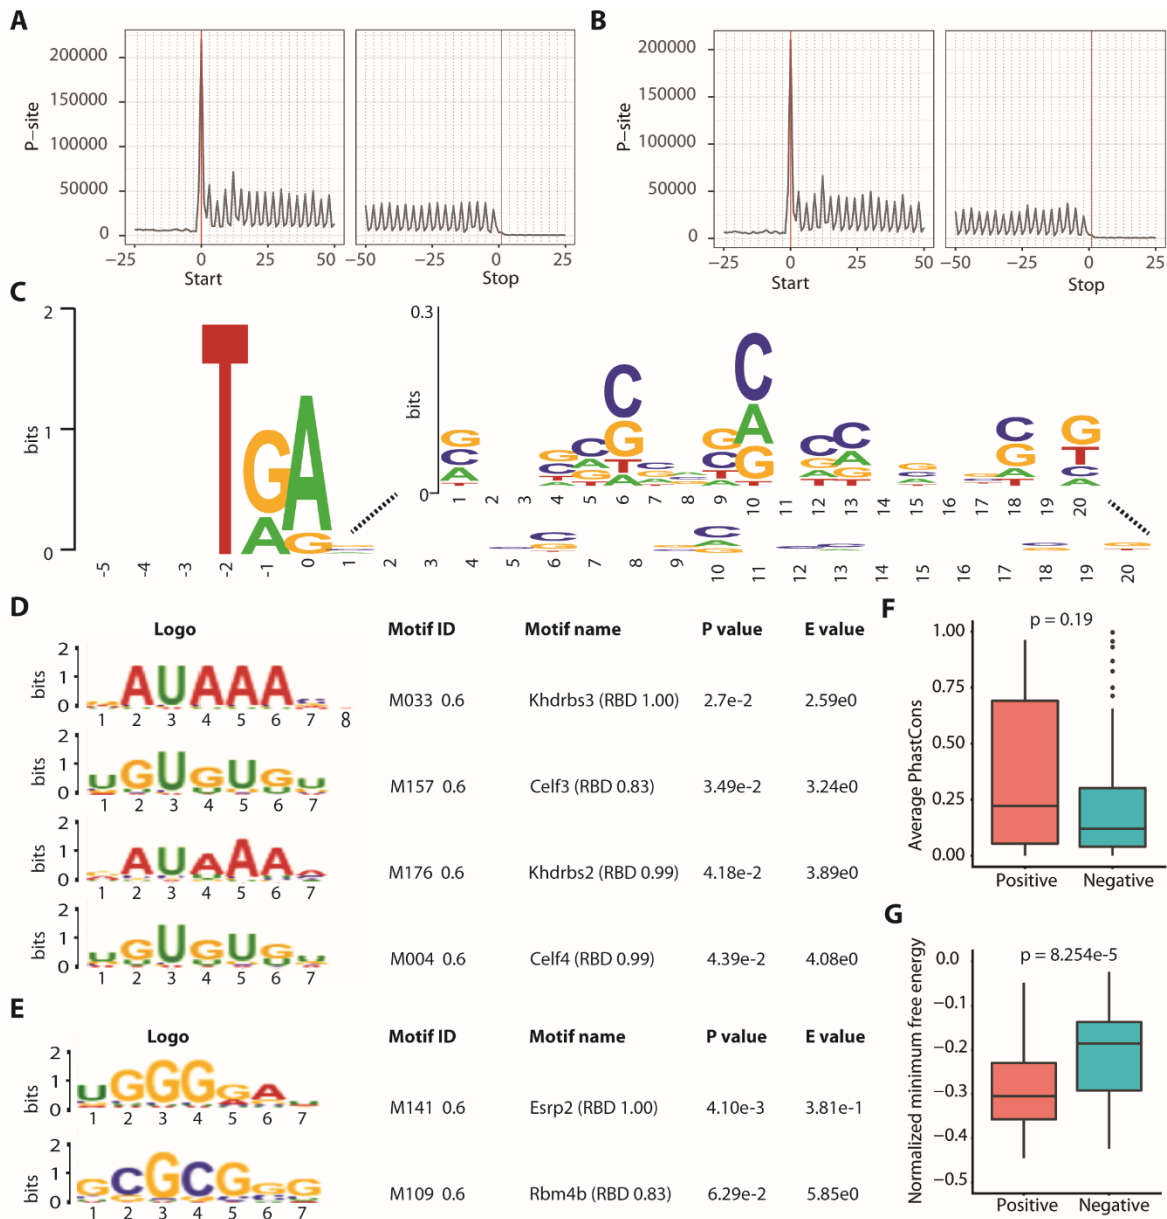

**Figure S6. Readthrough candidates show 3-nucleotide periodicity in the CDS and specific sequence features in the readthrough region.** *Related to Figure 6.* **A, B)** P sites detected globally in *Snap25::Rpl10a-Egfp* TRAP-RF and *Aldh1l1::Rpl10a-Egfp* TRAP-RF are plotted in A and B, respectively. **C)** Position weight matrix reveals TGA as the commonest stop codon in transcripts undergoing readthrough. Inset shows the magnification of the 20-nucleotide readthrough window. **D, E)** Analysis of motif enrichment for readthrough candidates using shuffled sequences as controls (D) and readthrough-negative candidates as controls (E) shows the overrepresented motifs for specific RNA-binding proteins. **F)** Conservation analysis of sequence between the first and second stop codons suggests that readthrough positive regions tend to be conserved, but not significantly, as compared to readthrough negative regions. Fisher's exact test was performed on the odds ratios of positive and negative groups. PhastCons scores greater than 0.5 are considered to represent conservation arbitrarily. **G)** Wilcoxon test to compare minimum free energies reveals a more stable secondary structure (less free energy) between the first and second stop codons of readthrough candidates. 48 *in vivo* readthrough candidates were used



in all analyses (2 were removed due to transcript ID problem). 46 readthrough-negative transcripts with matched lengths between the first and second stop codons were used in E, F and G. In C, D and E, Y axis represents conservation in bits.

**Table S2. Peptide products of alternative translation initiation sites detected in the mouse brain mass spectrometry data from Sharma et al, 2015. Related to Figure 2 and Table 1. "+" and "-" indicate downstream and upstream relative to the canonical initiation site, respectively.**

| SN  | Transcript ID      | Gene name | Alternative initiation site | Frame        |
|-----|--------------------|-----------|-----------------------------|--------------|
| 1.  | ENSMUST00000020657 | Ube2b     | -24                         | In frame     |
| 2.  | ENSMUST00000067664 | Ywhae     | -66                         | In frame     |
| 3.  | ENSMUST00000021933 | Ctsl      | -27                         | In frame     |
| 4.  | ENSMUST00000030134 | Rad23b    | -277                        | Out of frame |
| 5.  | ENSMUST00000021674 | Fos       | -46                         | Out of frame |
| 6.  | ENSMUST00000100802 | Nufip2    | -45                         | In frame     |
| 7.  | ENSMUST00000067664 | Ywhae     | -49                         | Out of frame |
| 8.  | ENSMUST00000110082 | Calm1     | -100                        | Out of frame |
| 9.  | ENSMUST00000103008 | Sdcbp     | -54                         | In frame     |
| 10. | ENSMUST00000027377 | Igfbp5    | -405                        | In frame     |
| 11. | ENSMUST00000111230 | Tagln2    | 7                           | Out of frame |
| 12. | ENSMUST00000031131 | Uchl1     | 15                          | In frame     |
| 13. | ENSMUST00000106255 | Cap1      | 9                           | In frame     |
| 14. | ENSMUST00000031565 | Fscn1     | 12                          | In frame     |
| 15. | ENSMUST00000112172 | Tmsb4x    | 7                           | Out of frame |
| 16. | ENSMUST00000112229 | Gpm6b     | 12                          | In frame     |
| 17. | ENSMUST00000110082 | Calm1     | 12                          | In frame     |
| 18. | ENSMUST00000108857 | Atox1     | 6                           | In frame     |

**Table S3. Transcripts showing at least 1% readthrough identified in vitro. Related to Figure 4.**

| <b>SN</b> | <b>Transcript symbol</b> | <b>Readthrough rate</b> |
|-----------|--------------------------|-------------------------|
| 1.        | <i>2010107E04Rik</i>     | 0.033                   |
| 2.        | <i>Aqp4</i>              | 0.382                   |
| 3.        | <i>Brk1</i>              | 0.048                   |
| 4.        | <i>Ctxn1</i>             | 0.327                   |
| 5.        | <i>Dlx1</i>              | 0.185                   |
| 6.        | <i>Dynll2</i>            | 0.106                   |
| 7.        | <i>Gpm6a</i>             | 0.056                   |
| 8.        | <i>Mdh1</i>              | 0.154                   |
| 9.        | <i>Mlc1</i>              | 0.055                   |
| 10.       | <i>Mt1</i>               | 0.024                   |
| 11.       | <i>Mt2</i>               | 0.041                   |
| 12.       | <i>Ncan</i>              | 0.014                   |
| 13.       | <i>Pea15a</i>            | 0.015                   |
| 14.       | <i>Pfn2</i>              | 0.015                   |
| 15.       | <i>Plat</i>              | 0.102                   |
| 16.       | <i>Ptms</i>              | 0.027                   |
| 17.       | <i>Ssna1</i>             | 0.322                   |
| 18.       | <i>Tmem261</i>           | 0.230                   |

**Table S4: Transcripts with at least 1% readthrough in vivo.** *Related to Figure 6.* Readthrough rates are an average of two Snap25::Rpl10a-Egfp and two Aldh1l1::Rpl10a-Egfp samples for neuron- and astrocyte-enriched transcripts, respectively, and an average of all four for cell type-nonspecific transcripts.

| <b><u>Neuronal</u></b>   |                                | <b><u>Astrocytic</u></b> |                                | <b><u>Non cell type-specific</u></b> |                                |
|--------------------------|--------------------------------|--------------------------|--------------------------------|--------------------------------------|--------------------------------|
| <b><u>Transcript</u></b> | <b><u>Readthrough rate</u></b> | <b><u>Transcript</u></b> | <b><u>Readthrough rate</u></b> | <b><u>Transcript</u></b>             | <b><u>Readthrough rate</u></b> |
| <i>Atp1a3</i>            | 0.017                          | <i>Aldoc</i>             | 0.065                          | <i>2010107E04Rik</i>                 | 0.051                          |
| <i>Celf5</i>             | 0.24                           | <i>Aqp4</i>              | 0.189                          | <i>Arl3</i>                          | 0.026                          |
| <i>Clstn3</i>            | 0.041                          | <i>Atp1a2</i>            | 0.025                          | <i>Brk1</i>                          | 0.023                          |
| <i>Cox6a1</i>            | 0.023                          | <i>Clu</i>               | 0.014                          | <i>Camk2n1</i>                       | 0.035                          |
| <i>Ctxn1</i>             | 0.18                           | <i>Csrp1</i>             | 0.014                          | <i>Fam195b</i>                       | 0.08                           |
| <i>Dynll2</i>            | 0.02                           | <i>Cst3</i>              | 0.019                          | <i>Lmtk3</i>                         | 0.319                          |
| <i>Eef1a2</i>            | 0.024                          | <i>Fam19a5</i>           | 0.15                           | <i>Ssna1</i>                         | 0.294                          |
| <i>Fam163b</i>           | 0.182                          | <i>Manbal</i>            | 0.078                          | <i>Triap1</i>                        | 0.17                           |
| <i>Fxyd7</i>             | 0.015                          | <i>Fopnl</i>             | 0.445                          | <i>Tmem88b</i>                       | 0.33                           |
| <i>Hint1</i>             | 0.064                          | <i>Map4</i>              | 0.317                          | <i>Ubl3</i>                          | 0.095                          |
| <i>Lynx1</i>             | 0.035                          | <i>Mbp</i>               | 0.012                          |                                      |                                |
| <i>Map1lc3a</i>          | 0.025                          | <i>Mlc1</i>              | 0.139                          |                                      |                                |
| <i>Mdh1</i>              | 0.071                          | <i>Mt1</i>               | 0.098                          |                                      |                                |
| <i>Pld3</i>              | 0.014                          | <i>Mt2</i>               | 0.037                          |                                      |                                |
| <i>Prr24</i>             | 0.209                          | <i>Ndrp2</i>             | 0.024                          |                                      |                                |
| <i>Ptms</i>              | 0.023                          | <i>Pea15a</i>            | 0.023                          |                                      |                                |
| <i>Serp2</i>             | 0.179                          | <i>Sparc</i>             | 0.009                          |                                      |                                |
| <i>Thy1</i>              | 0.014                          | <i>Smim7</i>             | 0.119                          |                                      |                                |
| <i>Tmem240</i>           | 0.041                          | <i>Ttr</i>               | 0.033                          |                                      |                                |
| <i>Tmem261</i>           | 0.209                          |                          |                                |                                      |                                |
| <i>Yaf2</i>              | 0.243                          |                          |                                |                                      |                                |
